# Supplementary material for: AntiBody Sequence Database
Source: PubMed Central journal article supplement (PMC11655285; doi:10.1093/nargab/lqae171), 2024-12-18
Supplement: lqae171_supplemental_file.pdf [file lqae171_supplemental_file.pdf]

## Supplementary figure 1 - All data from **ABSD**

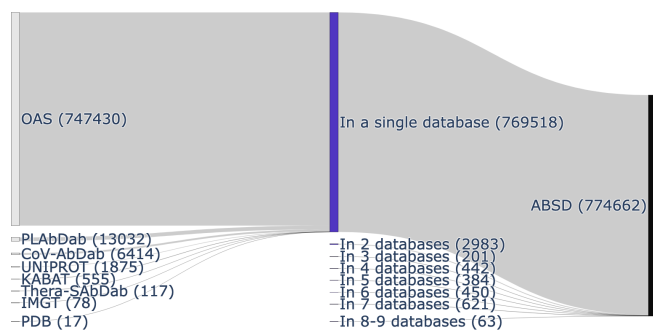

Fig. 1: Proportions of **ABSD**'s antibody sequences in original databases. The right part represents the proportions of the whole **ABSD** dataset, extracted from given databases. The middle part represents the proportions of antibody sequences present in only one (top) or multiple (bottom) databases.

## Supplementary data

### Data acquisition for ABDB

Data from <http://www.abysbank.org/abdb/> (**Download Dataset** tab) can be retrieved by downloading the **Complete Dataset of Redundant Antibody List** ([http://www.abysbank.org/abdb/Data/Redundant\\_files/Redundant\\_LH\\_Combined\\_Martin.txt](http://www.abysbank.org/abdb/Data/Redundant_files/Redundant_LH_Combined_Martin.txt)).

From this file, all PDB IDs (the 4 characters preceding the `_`) were used to query the PDB (<https://www.rcsb.org/downloads/fasta>) and all results were merged into a single FASTA file.

### Data acquisition for AbPDB

From <http://www.abysbank.org/abpdbseq/> (file `abpdbseq_latest.faa`), all PDB IDs (the 4 characters preceding the `_`) were used to query the PDB (<https://www.rcsb.org/downloads/fasta>) and all results were merged into a single FASTA file.

### Data acquisition for CoV-AbDab

From <https://opig.stats.ox.ac.uk/webapps/covabdab/>, a csv file can be accessed from **Downloads** tab, **Database (CSV)**.

### Data acquisition for CoV-AbDab-PDB

From <https://opig.stats.ox.ac.uk/webapps/covabdab/>, a folder with PDB sequences can be accessed from **Downloads** tab, **PDB Structures (.tar.gz)**. From this file, all PDB IDs (the 4 characters preceding the `_`) were used to query the PDB (<https://www.rcsb.org/downloads/fasta>) and all results were merged into a single FASTA file.

### Data acquisition for EBOLA

IDs were obtained from Table S7 of Supplementary Materials of *Isolation of potent neutralizing antibodies from a survivor of the 2014 Ebola virus outbreak*. Data were then retrieved from GeneBank (<https://www.ncbi.nlm.nih.gov/genbank/>).

### Data acquisition for IMGT-INN

From the folder obtained at <https://www.imgt.org/download/3Dstructure-DB/IMGT3DFlatFiles.tgz>, the INN (ungzipped) files are retrieved. The PDB (ungzipped) files were used to retrieve IDs (the 4 characters preceding the `_`) to then query the PDB (<https://www.rcsb.org/downloads/fasta>) and all results were merged into a single FASTA file.

### Data acquisition for IMGT

Data are obtained from <https://www.imgt.org/3Dstructure-DB/> by setting **Display results** to *Domains and sequence alignment* and **IMGT complex type** (in **IDENTIFICATION**, in **Search using IMGT-ONTOLOGY concepts**) to *IG/Ag*. The result page is copied into a text file.

### Data acquisition for IMGT2

Data are obtained from a dump of <https://www.imgt.org/3Dstructure-DB/> by setting **Display results** to *Domains and sequence alignment* and **IMGT receptor type** (in **IDENTIFICATION**, in **Search using IMGT-ONTOLOGY concepts**) to *IG*. The result page is copied into a text file.

### Data acquisition for KABAT

The file was obtained from <http://www.abysbank.org/kabat/>.

### Data acquisition for OAS

Files are obtained from [https://opig.stats.ox.ac.uk/webapps/oas/oas\\_paired/](https://opig.stats.ox.ac.uk/webapps/oas/oas_paired/), when clicking "Search" without using any attributes, then clicking on here link.

### Data acquisition for PLaBdab

Data are obtained from [https://opig.stats.ox.ac.uk/webapps/plabdab/static/downloads/paired\\_sequences.csv.gz](https://opig.stats.ox.ac.uk/webapps/plabdab/static/downloads/paired_sequences.csv.gz).

### Data acquisition for PDB

All IDs were taken from the PDB advanced search page (<https://www.rcsb.org/search/advanced>) by searching **Macromolecule Name, has any of words, light heavy**. All PDB IDs (the 4 characters preceding the `_`) were used to query the PDB (<https://www.rcsb.org/downloads/fasta>) and all results were merged into a single FASTA file.

### Data acquisition for SAbDab

From <https://opig.stats.ox.ac.uk/webapps/sabdab-sabpred/sabdab/search/?all=true#downloads>, the link **Download the summary file** (<https://opig.stats.ox.ac.uk/webapps/sabdab-sabpred/sabdab/summary/all/>) was used. From this file, all PDB IDs were used to query the PDB (<https://www.rcsb.org/downloads/fasta>) and all results were merged into a single FASTA file.

### Data acquisition for SACS

From <http://www.abysbank.org/sacs/> (**Download Chain List**), the `antibodies.txt` file was retrieved. From it, all PDB IDs (the 4 characters preceding the `_`) were used to query the PDB (<https://www.rcsb.org/downloads/fasta>) and all results were merged into a single FASTA file.

#### Data acquisition for TheraSAbDab

From Thera-SAbDab page <https://opig.stats.ox.ac.uk/webapps/sabdab-sabpred/therasabdab/search/?all=true>, the csv file was downloaded ([https://opig.stats.ox.ac.uk/webapps/sabdab-sabpred/static/downloads/TheraSAbDab\\_SeqStruc\\_OnlineDownload.csv](https://opig.stats.ox.ac.uk/webapps/sabdab-sabpred/static/downloads/TheraSAbDab_SeqStruc_OnlineDownload.csv)).

#### Data acquisition for UNIPROT

A fasta file was generated from <https://www.uniprot.org/uniprotkb?query=Immunoglobulin%2C%20Antibody%2C%20IG>.
